# Supplementary material
Source: ML conference proceedings conference paper supplement (https://proceedings.mlr.press/v139/liu21l.html)
Supplement: Supplementary file 1 [file liu21l-supp.zip]

# Appendix For "One Pass Late Fusion Multi-view Clustering"

Xinwang Liu<sup>1</sup> Li Liu<sup>1</sup> Qing Liao<sup>2</sup> Siwei Wang<sup>1</sup> Yi Zhang<sup>1</sup> Wenxuan Tu<sup>1</sup> Chang Tang<sup>3</sup>  
Jiyuan Liu<sup>1</sup> En Zhu<sup>1</sup>

## 1. Summary of the Appendix

In this appendix, we provide the generalization analysis of the proposed algorithm and give the detailed proof.

## 2. The Theoretical Results

Generalization error for  $k$ -means clustering has been studied by fixing the centroids obtained in the training process and computing their generalization to unseen data (Maurer & Pontil, 2010; Liu et al., 2016). In this section, we study how the centroids obtained by the proposed OP-LFMVC generalizes onto test data by deriving its generalization bound.

We now define the error of OP-LFMVC. Let  $\hat{\mathbf{C}} = [\hat{\mathbf{C}}_1, \dots, \hat{\mathbf{C}}_k]$  be the learned matrix composed of the  $k$  centroids,  $\hat{\beta}$  the learned kernel weights and  $\{\hat{\mathbf{W}}_p\}_{p=1}^m$  the transformation matrices learned by the proposed OP-LFMVC. By defining  $\Theta = \{\mathbf{e}_1, \dots, \mathbf{e}_k\}$ , effective OP-LFMVC should make the following error small,

$$1 - \mathbb{E}_{\mathbf{x}} \left[ \max_{\mathbf{y} \in \Theta} \left\langle \sum_{p=1}^m \hat{\beta}_p \hat{\mathbf{W}}_p^\top \mathbf{h}_p(\mathbf{x}), \hat{\mathbf{C}} \mathbf{y} \right\rangle \right], \quad (1)$$

where  $\mathbf{h}_p(\mathbf{x})$  denotes the  $p$ -th partition vector corresponding to the  $p$ -th view of  $\mathbf{x}$  with  $\|\mathbf{h}_p(\mathbf{x})\| = 1$ , and  $\mathbf{e}_1, \dots, \mathbf{e}_k$  form the orthogonal bases of  $\mathbb{R}^k$ . Intuitively, it says that the expected alignment between test points and their closest centroid should be high. In the following, we show how the proposed algorithm achieves this goal.

Let us define a function class first:

$$\mathcal{F} = \left\{ f : \mathbf{x} \mapsto 1 - \max_{\mathbf{y} \in \Theta} \left\langle \sum_{p=1}^m \beta_p \mathbf{W}_p^\top \mathbf{h}_p(\mathbf{x}), \mathbf{C} \mathbf{y} \right\rangle \mid \sum_{p=1}^m \beta_p^2 = 1, \beta_p \geq 0, \mathbf{C} \in \mathbb{R}^{k \times k}, \mathbf{C}^\top \mathbf{C} = \mathbf{I}_k, \mathbf{W}_p \in \mathbb{R}^{k \times k}, \mathbf{W}_p^\top \mathbf{W}_p = \mathbf{I}_k, \forall p \right\}. \quad (2)$$

<sup>\*</sup>Equal contribution <sup>1</sup>School of Computer, National University of Defense Technology. <sup>2</sup>Department of Computer Science and Technology, Harbin Institute of Technology, Shenzhen. <sup>3</sup>School of Computer Science, China University of Geosciences. Correspondence to: Xinwang Liu <xinwangliu@nudt.edu.cn>.

We have the following claim on the generalization error bound for the proposed OP-LFMVC.

**Theorem 1.** For any  $\delta > 0$ , with probability at least  $1 - \delta$ , the following inequality holds for all  $f \in \mathcal{F}$ ,

$$\mathbb{E}_{\mathbf{x}}[f(\mathbf{x})] \leq \frac{1}{n} \sum_{i=1}^n f(\mathbf{x}_i) + \frac{\sqrt{\pi/2k}}{\sqrt{n}} + 2\sqrt{\frac{\log 1/\delta}{2n}}. \quad (3)$$

## 3. Proof of Theorem 1

In the following, we give the detailed proof of Theorem 1. For i.i.d. given samples  $\{\mathbf{x}_i\}_{i=1}^n$ , OP-LFMVC minimizes the empirical error, i.e.,

$$1 - \frac{1}{n} \sum_{i=1}^n \max_{\mathbf{y}_i \in \Theta} \left\langle \sum_{p=1}^m \beta_p \mathbf{W}_p^\top \mathbf{h}_p(\mathbf{x}_i), \mathbf{C} \mathbf{y}_i \right\rangle, \quad (4)$$

where  $\Theta = \{\mathbf{e}_1, \dots, \mathbf{e}_k\}$  and  $\mathbf{e}_1, \dots, \mathbf{e}_k$  form the orthogonal bases of  $\mathbb{R}^k$ .

Let

$$\hat{R}(\mathbf{C}, \beta, \{\mathbf{W}_p\}_{p=1}^m) = 1 - \frac{1}{n} \sum_{i=1}^n \max_{\mathbf{y}_i \in \Theta} \left\langle \sum_{p=1}^m \beta_p \mathbf{W}_p^\top \mathbf{h}_p(\mathbf{x}_i), \mathbf{C} \mathbf{y}_i \right\rangle. \quad (5)$$

Our proof idea is to upper the following bound

$$\sup_{\mathbf{C}, \beta, \{\mathbf{W}_p\}_{p=1}^m} \left( \mathbb{E} \left[ \hat{R}(\mathbf{C}, \beta, \{\mathbf{K}_p\}_{p=1}^m) \right] - \hat{R}(\mathbf{C}, \beta, \{\mathbf{W}_p\}_{p=1}^m) \right), \quad (6)$$

and then upper bound the term  $\hat{R}(\mathbf{C}, \beta, \{\mathbf{W}_p\}_{p=1}^m)$  by the proposed objective.

Let us define a function class  $\mathcal{F}$  first:

$$\mathcal{F} = \left\{ f : \mathbf{x} \mapsto 1 - \max_{\mathbf{y} \in \Theta} \left\langle \sum_{p=1}^m \beta_p \mathbf{W}_p^\top \mathbf{h}_p(\mathbf{x}), \mathbf{C} \mathbf{y} \right\rangle \mid \sum_{p=1}^m \beta_p^2 = 1, \beta_p \geq 0, \mathbf{C} \in \mathbb{R}^{k \times k}, \mathbf{C}^\top \mathbf{C} = \mathbf{I}_k, \mathbf{W}_p \in \mathbb{R}^{k \times k}, \mathbf{W}_p^\top \mathbf{W}_p = \mathbf{I}_k, \forall p \right\}. \quad (7)$$

Then, Eq. (6) can be rewritten as,

$$\sup_{f \in \mathcal{F}} \left( \mathbb{E}[f(\mathbf{x})] - \frac{1}{n} \sum_{i=1}^n f(\mathbf{x}_i) \right). \quad (8)$$

It is not difficult to check that

$$\begin{aligned}
 & \left\langle \sum_{p=1}^m \beta_p \mathbf{W}_p^\top \mathbf{h}_p(\mathbf{x}), \mathbf{C}\mathbf{y} \right\rangle \\
 &= \mathbf{y}^\top \mathbf{C}^\top \left( \sum_{p=1}^m \beta_p \mathbf{W}_p^\top \mathbf{h}_p(\mathbf{x}) \right), \\
 &= \left( \frac{1}{|\mathbf{C}_l|} \sum_{\mathbf{x}_j \in \mathbf{C}_l} \sum_{p=1}^m \beta_p \mathbf{W}_p^\top \mathbf{h}_p(\mathbf{x}_j) \right)^\top \left( \sum_{p=1}^m \beta_p \mathbf{W}_p^\top \mathbf{h}_p(\mathbf{x}) \right), \\
 &= \frac{1}{|\mathbf{C}_l|} \sum_{\mathbf{x}_j \in \mathbf{C}_l} \sum_{p,q=1}^m \beta_p \beta_q \mathbf{h}_p^\top(\mathbf{x}_j) \mathbf{W}_p \mathbf{W}_q^\top \mathbf{h}_q(\mathbf{x}), \\
 &\leq \frac{1}{|\mathbf{C}_l|} \sum_{\mathbf{x}_j \in \mathbf{C}_l} \sum_{p,q=1}^m \beta_p \beta_q \\
 &\leq \sum_{p,q=1}^m \frac{1}{2} (\beta_p^2 + \beta_q^2) = 1.
 \end{aligned} \tag{9}$$

By the same way, one can readily prove that  $-1 \leq \left\langle \sum_{p=1}^m \beta_p \mathbf{W}_p^\top \mathbf{h}_p(\mathbf{x}), \mathbf{C}\mathbf{y} \right\rangle \leq 1$ . As a result, we have  $f(\mathbf{x}) \leq 2$ .

By exploiting McDiarmid's concentration inequality, we have the following theorem.

**Theorem 2.** For any  $\delta > 0$ , with probability at least  $1 - \delta$ , the following holds for all  $f \in \mathcal{F}$ :

$$\mathbb{E}[f(\mathbf{x})] - \frac{1}{n} \sum_{i=1}^n f(\mathbf{x}_i) \leq 2\mathfrak{R}_n(\mathcal{F}) + 2\sqrt{\frac{\log 1/\delta}{2n}}, \tag{10}$$

where

$$\mathfrak{R}_n(\mathcal{F}) = \frac{1}{n} \mathbb{E} \left[ \sup_{f \in \mathcal{F}} \sum_{i=1}^n \gamma_i f(\mathbf{x}_i) \right] \tag{11}$$

and  $\gamma_1, \dots, \gamma_n$  are i.i.d. Rademacher random variables uniformly distributed from  $\{-1, 1\}$ .

Now, we are going to upper bound  $\mathfrak{R}_n(\mathcal{F})$ . Since there is a maximization function in  $f$ , it is not easy to directly upper  $\mathfrak{R}_n(\mathcal{F})$ . Similar to the proof method in (Maurer & Pontil, 2010), we upper bound it by introducing Gaussian complexities:

$$\mathfrak{G}_n(\mathcal{F}) = \frac{1}{n} \mathbb{E} \left[ \sup_{f \in \mathcal{F}} \sum_{i=1}^n \gamma_i f(\mathbf{x}_i) \right], \tag{12}$$

where  $\gamma_1, \dots, \gamma_n$  are i.i.d. Gaussian random variables with zero mean and unit standard deviation.

The following two lemmas (Maurer & Pontil, 2010) will be used in our proof.

**Lemma 1.**

$$\mathfrak{R}_n(\mathcal{F}) \leq \sqrt{\pi/2} \mathfrak{G}_n(\mathcal{F}). \tag{13}$$

**Lemma 2.** Let  $G_f = \sum_{i=1}^n \gamma_i G(\mathbf{x}_i, f)$  and  $H_f = \sum_{i=1}^n \gamma_i H(\mathbf{x}_i, f)$  be two zero mean, separable Gaussian processes. If for all  $f_1, f_2 \in \mathcal{F}$ ,

$$\mathbb{E}[(G_{f_1} - G_{f_2})^2] \leq \mathbb{E}[(H_{f_1} - H_{f_2})^2]. \tag{14}$$

Then,

$$\mathbb{E}[\sup_{f \in \mathcal{F}} G_f] \leq \mathbb{E}[\sup_{f \in \mathcal{F}} H_f]. \tag{15}$$

In our case, let

$$G_f = G_{\beta, \mathbf{C}} = \sum_{i=1}^n \gamma_i \left( 1 - \max_{\mathbf{y}_i \in \Theta} h_{\beta}^\top(\mathbf{x}_i) \mathbf{C} \mathbf{y}_i \right) \tag{16}$$

and

$$H_f = H_{\beta, \mathbf{C}} = \sum_{i=1}^n h_{\beta}^\top(\mathbf{x}_i) \sum_{l=1}^k \gamma_{il} \mathbf{C} \mathbf{e}_l. \tag{17}$$

where  $h_{\beta}(\mathbf{x}) = \sum_{p=1}^m \beta_p \mathbf{W}_p^\top \mathbf{h}_p(\mathbf{x})$ .

we are going to prove that

$$\mathbb{E}_{\gamma} [(G_{\beta_1, \mathbf{C}_1} - G_{\beta_2, \mathbf{C}_2})^2] \leq \mathbb{E}_{\gamma} [(H_{\beta_1, \mathbf{C}_1} - H_{\beta_2, \mathbf{C}_2})^2]. \tag{18}$$

Specifically, for any  $f_1, f_2 \in \mathcal{F}$ , we have

$$\begin{aligned}
 & \left[ \left( 1 - \max_{\mathbf{y} \in \Theta} h_{\beta_1}^\top(\mathbf{x}) \mathbf{C}_1 \mathbf{y} \right) - \left( 1 - \max_{\mathbf{y} \in \Theta} h_{\beta_2}^\top(\mathbf{x}) \mathbf{C}_2 \mathbf{y} \right) \right]^2 \\
 &= \left( \max_{\mathbf{y} \in \Theta} h_{\beta_1}^\top(\mathbf{x}) \mathbf{C}_1 \mathbf{y} - \max_{\mathbf{y} \in \Theta} h_{\beta_2}^\top(\mathbf{x}) \mathbf{C}_2 \mathbf{y} \right)^2 \\
 &\leq \left( \max_{\mathbf{y} \in \Theta} \left( h_{\beta_1}^\top(\mathbf{x}) \mathbf{C}_1 \mathbf{y} - h_{\beta_2}^\top(\mathbf{x}) \mathbf{C}_2 \mathbf{y} \right) \right)^2 \\
 &= \left( \max_{\mathbf{y} \in \Theta} \left( h_{\beta_1}^\top(\mathbf{x}) \mathbf{C}_1 - h_{\beta_2}^\top(\mathbf{x}) \mathbf{C}_2 \right) \mathbf{y} \right)^2 \\
 &= \max_{\mathbf{y} \in \Theta} \left( \sum_{l=1}^k y_l \left( h_{\beta_1}^\top(\mathbf{x}) \mathbf{C}_1 - h_{\beta_2}^\top(\mathbf{x}) \mathbf{C}_2 \right) \mathbf{e}_l \right)^2 \\
 &\leq \sum_{l=1}^k \left( \left( h_{\beta_1}^\top(\mathbf{x}) \mathbf{C}_1 - h_{\beta_2}^\top(\mathbf{x}) \mathbf{C}_2 \right) \mathbf{e}_l \right)^2,
 \end{aligned} \tag{19}$$

where the last inequality holds because  $\sum_{l=1}^k y_l = 1$ .

Thus, we have

$$\begin{aligned}
 & \mathbb{E}_\gamma \left[ (G_{\beta_1, \mathbf{C}_1} - G_{\beta_2, \mathbf{C}_2})^2 \right] \\
 = & \mathbb{E}_\gamma \left[ \left( \sum_{i=1}^n \gamma_i \left[ \left( 1 - \max_{\mathbf{y}_i \in \Theta} h_{\beta_1}^\top(\mathbf{x}_i) \mathbf{C}_1 \mathbf{y}_i \right) \right. \right. \right. \\
 & \quad \left. \left. \left. - \left( 1 - \max_{\mathbf{y}_i \in \Theta} h_{\beta_2}^\top(\mathbf{x}_i) \mathbf{C}_2 \mathbf{y}_i \right) \right] \right)^2 \right] \\
 = & \sum_{i=1}^n \left( \max_{\mathbf{y}_i \in \Theta} h_{\beta_1}^\top(\mathbf{x}_i) \mathbf{C}_1 \mathbf{y}_i - \max_{\mathbf{y}_i \in \Theta} h_{\beta_2}^\top(\mathbf{x}_i) \mathbf{C}_2 \mathbf{y}_i \right)^2 \\
 \leq & \sum_{i=1}^n \sum_{l=1}^k \left( \left( h_{\beta_1}^\top(\mathbf{x}_i) \mathbf{C}_1 - h_{\beta_2}^\top(\mathbf{x}_i) \mathbf{C}_2 \right) \mathbf{e}_l \right)^2 \\
 = & \mathbb{E}_\gamma \left[ (H_{\beta_1, \mathbf{C}_1} - H_{\beta_2, \mathbf{C}_2})^2 \right].
 \end{aligned} \tag{20}$$

Using Hölder's inequality and Jensen's inequality, we have

$$\begin{aligned}
 \mathbb{E} \left[ \sup_{f \in \mathcal{F}} H_f \right] &= \mathbb{E}_\gamma \left[ \sup_{\beta, \mathbf{C}} \sum_{i=1}^n \sum_{l=1}^k \gamma_{il} h_{\beta}^\top(\mathbf{x}_i) \mathbf{C} \mathbf{e}_l \right] \\
 &\leq \mathbb{E}_\gamma \left[ \sum_{l=1}^k \left| \sum_{i=1}^n \gamma_{il} \right| \right] \\
 &\leq k \sqrt{n}.
 \end{aligned} \tag{21}$$

Combining Lemmas 1 and 2, Eqs. (12), (20), and (21), we have

$$\begin{aligned}
 \mathfrak{R}_n(\mathcal{F}) &\leq \frac{1}{n} \sqrt{\pi/2} \mathbb{E} \left[ \sup_{f \in \mathcal{F}} G_{\beta, \mathbf{C}} \right] \\
 &\leq \frac{1}{n} \sqrt{\pi/2} \mathbb{E} \left[ \sup_{f \in \mathcal{F}} H_{\beta, \mathbf{C}} \right] \\
 &\leq \frac{1}{n} \sqrt{\pi/2} k \sqrt{n} \\
 &= \frac{\sqrt{\pi/2} k}{\sqrt{n}}.
 \end{aligned}$$

Putting the above inequality into Theorem 2, with probability at least  $1 - \delta$ , the following holds for all  $f \in \mathcal{F}$ :

$$\mathbb{E}[f(\mathbf{x})] \leq \frac{1}{n} \sum_{i=1}^n f(\mathbf{x}_i) + \frac{\sqrt{\pi/2} k}{\sqrt{n}} + 2 \sqrt{\frac{\log 1/\delta}{2n}}. \tag{22}$$

This completes the proof.

## References

- Liu, T., Tao, D., and Xu, D. Dimensionality-dependent generalization bounds for  $k$ -dimensional coding schemes. *Neural computation*, 28(10):2213–2249, 2016.
- Maurer, A. and Pontil, M.  $k$ -dimensional coding schemes in Hilbert spaces. *IEEE Transactions on Information Theory*, 56(11):5839–5846, 2010.
